# Supplementary material
Source: PubMed Central journal article supplement (PMC4305473)
Supplement: NIHMS626621-supplement-1.pdf [file NIHMS626621-supplement-1.pdf]

**Table S1. Principal Component Analysis Pattern**

| Primary Cognitive Domain                              | Percentage of Test Allocated to Each Rotated Component* |                          |                          |
|-------------------------------------------------------|---------------------------------------------------------|--------------------------|--------------------------|
|                                                       | Test                                                    | Component 1 <sup>^</sup> | Component 2 <sup>^</sup> |
| Memory                                                | Delayed Recall                                          | 88%                      | 21%                      |
|                                                       | Short Delayed Recall                                    | 86%                      | 25%                      |
|                                                       | Immediate Recall Total                                  | 75%                      | 35%                      |
|                                                       | Recognition Total                                       | 64%                      | 29%                      |
| Both Memory & Executive function                      | Digit symbol Coding                                     | 41%                      | 71%                      |
| Executive function                                    | Block Design                                            | 26%                      | 64%                      |
|                                                       | Trails A                                                | 10%                      | 75%                      |
|                                                       | Trails B                                                | 37%                      | 71%                      |
| Eigenvalues (total variance explained by each factor) |                                                         | 2.87                     | 2.29                     |

*An eigenvalue greater than 1.0 is generally accepted to represent adequate loading<sup>26</sup>*

*\*Percentage = Correlation coefficient X 100*

*<sup>^</sup>Based on this loading pattern, Component 1 was felt to represent Memory and Component 2 was felt to represent Executive Function*
