# Supplementary material
Source: PubMed Central journal article supplement (PMC4305473)
Supplement: NIHMS626621-supplement-2.pdf [file NIHMS626621-supplement-2.pdf]

**Table S2. Baseline Demographics and Clinical Characteristics by Quartiles of Memory Performance**

| Quartiles of Memory Factor           | Memory Q1 (N = 73) | Memory Q2 (N = 73) | Memory Q3 (N = 73) | Memory Q4 (N = 73) | Trend p-value |
|--------------------------------------|--------------------|--------------------|--------------------|--------------------|---------------|
| Memory factor                        | -1.14 ± 0.37       | -0.39 ± 0.17       | 0.26 ± 0.18        | 1.27 ± 0.48        | -             |
| Age (years)                          | 70.9 ± 13.5        | 66.4 ± 15.1        | 60.5 ± 15.9        | 54.6 ± 17.6        | <0.001        |
| Female                               | 29 (40%)           | 28 (38%)           | 30 (41%)           | 49 (67%)           | 0.001         |
| Black                                | 15 (21%)           | 14 (19%)           | 17 (23%)           | 20 (27%)           | 0.3           |
| Education                            |                    |                    |                    |                    |               |
| < High School (HS)                   | 5 (7%)             | 14 (19%)           | 4 (5%)             | 6 (8%)             | 0.04          |
| HS to 2 years college                | 47 (64%)           | 41 (56%)           | 40 (55%)           | 34 (47%)           |               |
| 2+ years college                     | 21 (29%)           | 18 (25%)           | 29 (40%)           | 33 (45%)           |               |
| Hypertension                         | 65 (89%)           | 68 (93%)           | 66 (90%)           | 64 (88%)           | 0.7           |
| HF                                   | 30 (41%)           | 34 (47%)           | 23 (32%)           | 18 (25%)           | 0.01          |
| Stroke                               | 15 (21%)           | 17 (23%)           | 13 (18%)           | 6 (8%)             | 0.03          |
| CVD                                  | 38 (52%)           | 40 (55%)           | 27 (37%)           | 25 (34%)           | 0.01          |
| Primary cause of ESRD                |                    |                    |                    |                    |               |
| Diabetes                             | 25 (34%)           | 27 (37%)           | 23 (32%)           | 26 (36%)           | 0.03          |
| Hypertension                         | 19 (26%)           | 19 (26%)           | 11 (15%)           | 7 (10%)            |               |
| Other                                | 11 (15%)           | 8 (11%)            | 15 (21%)           | 15 (21%)           |               |
| Unknown                              | 7 (10%)            | 11 (15%)           | 12 (16%)           | 7 (10%)            |               |
| Glomerulonephritis                   | 11 (15%)           | 8 (11%)            | 12 (16%)           | 18 (25%)           |               |
| Smoking History                      |                    |                    |                    |                    |               |
| Never                                | 27 (37%)           | 19 (26%)           | 33 (45%)           | 33 (45%)           | 0.2           |
| Past                                 | 41 (56%)           | 44 (61%)           | 33 (45%)           | 33 (45%)           |               |
| Current                              | 5 (7%)             | 9 (13%)            | 7 (10%)            | 7 (10%)            |               |
| Dialysis Access                      |                    |                    |                    |                    |               |
| Fistula                              | 45 (62%)           | 46 (63%)           | 46 (63%)           | 49 (67%)           | 0.6           |
| Graft                                | 4 (5%)             | 4 (5%)             | 5 (7%)             | 5 (7%)             |               |
| Catheter                             | 24 (33%)           | 23 (32%)           | 22 (30%)           | 19 (26%)           |               |
| Pre Systolic BP (mmHg)               | 142.4 ± 20.2       | 139.8 ± 22.7       | 142.3 ± 18.2       | 140.7 ± 21.8       | 0.7           |
| Pre Diastolic BP (mmHg)              | 72.3 ± 10.8        | 72.1 ± 12.4        | 74.7 ± 10.7        | 74.7 ± 14.4        | 0.2           |
| spKt/V                               | 1.53 ± 0.22        | 1.50 ± 0.26        | 1.47 ± 0.22        | 1.55 ± 0.25        | 0.8           |
| Body Mass Index (kg/m <sup>2</sup> ) | 27.3 ± 6.1         | 27.8 ± 6.4         | 28.3 ± 6.6         | 28.6 ± 6.8         | 0.2           |
| Hematocrit (%)                       | 36.1 ± 3.1         | 35.6 ± 3.3         | 34.9 ± 4.1         | 35.9 ± 3.5         | 0.7           |
| Albumin (mg/dL)                      | 3.8 ± 0.3          | 3.8 ± 0.4          | 3.9 ± 0.4          | 3.8 ± 0.4          | 0.4           |
| Phosphorus (mg/dL)                   | 5.3 ± 1.5          | 5.6 ± 1.5          | 5.4 ± 1.6          | 5.5 ± 1.4          | 0.4           |
| Dialysis Duration(mo)                | 13.6 (6.5, 26.2)   | 14.5 (8.3, 34.0)   | 14.2 (7.1,29.1)    | 16.6 (7.0,45.7)    | 0.5           |
| WBC (K/μl)                           | 8.1 ± 2.4          | 7.7 ± 2.2          | 7.3 ± 2.6          | 6.8 ± 1.9          | 0.001         |

Presented as either n (%), mean±SD, or median (inter-quartile range) as appropriate

HF = heart failure, CVD = Cardiovascular disease is a composite of coronary artery disease and/or peripheral vascular disease, ESRD = end-stage renal disease, BP = blood pressure, WBC = white blood cell count.
